# Supplementary material for: Downregulation of miR-199b is associated with distant metastasis in colorectal cancer via activation of SIRT1 and inhibition of CREB/KISS1 signaling
Source: PubMed Central journal article supplement (PMC5085212; doi:10.18632/oncotarget.9042), 2016-04-27
Supplement: oncotarget-07-35092-s001.pdf [file oncotarget-07-35092-s001.pdf]

SUPPLEMENTARY FIGURES AND TABLES

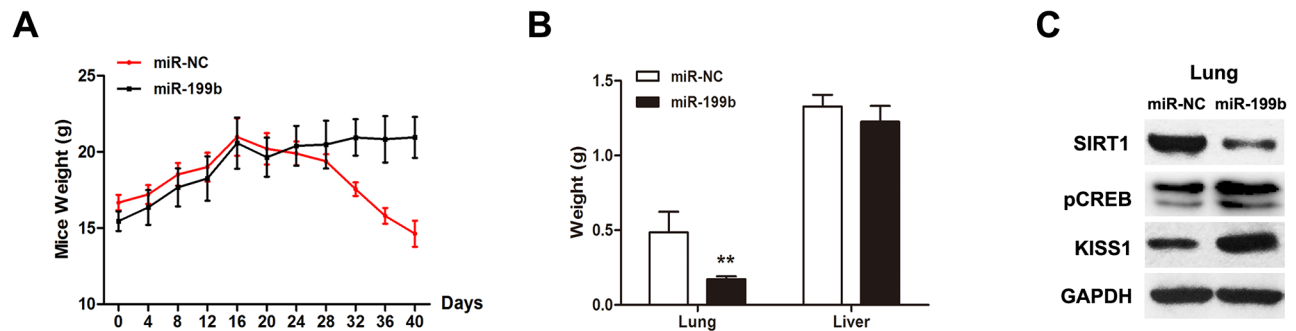

**Supplementary Figure S1: Upregulation of miR-199b results in suppression of metastasis of SW620 cells *in vivo*.** **A.** Mice weight of each group during the mice grown process. NC group showed weight loss after 16 days injection. **B.** Weight of lungs and livers were measured from the metastasis model. The weight of NC group seemed heavier than that of miR-199b overexpression group. **C.** SIRT1, pCREB and KISS1 expression level were measured using Western Blot in tissues from lungs. \*\*P<0.01.

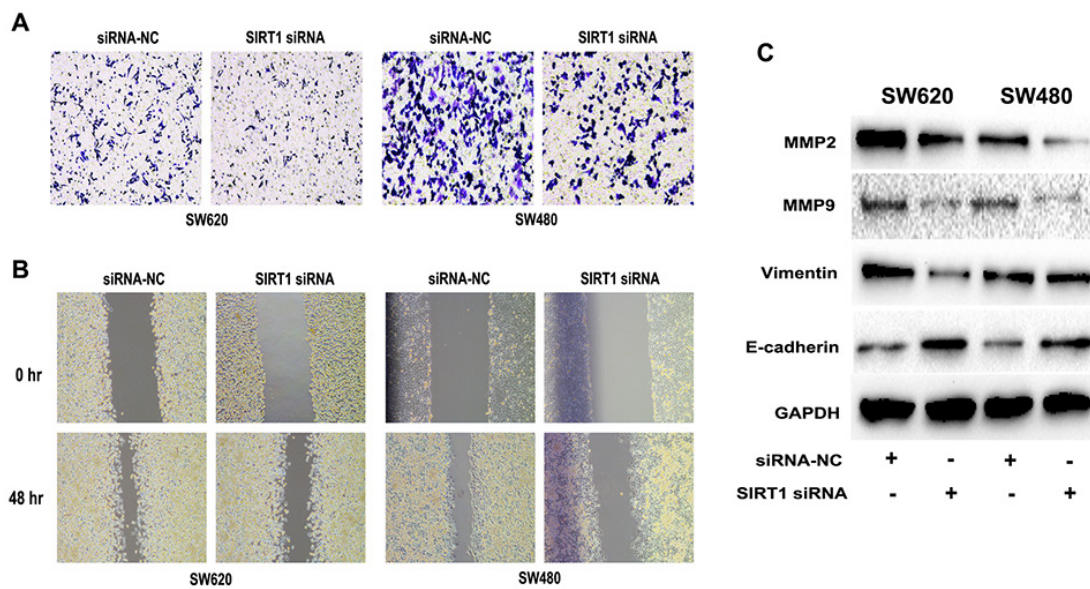

**Supplementary Figure S2: Knockdown of SIRT1 inhibits cell invasion and migration in SW620 and SW480 cell lines.** **A.** Inhibition of SIRT1 expression repressed cell invasion of SW620 and SW480 cells. **B.** Silencing of SIRT1 led to weakening migration ability of CRC cells. **C.** Western blot analysis assessed protein level changes of MMP2, MMP9, Vimentin and E-cadherin after treated with siRNA-SIRT1.

**Supplementary Table S1: Primer sequences of genes**

| Gene         | Primer sequences                                                                                                                                         |
|--------------|----------------------------------------------------------------------------------------------------------------------------------------------------------|
| miR-199b     | Forward: 5'-CCCAGTGTTTAGACTATCTGTTC-3'                                                                                                                   |
| U6           | Forward: 5'-CTCGCTTCGGCAGCACA-3'                                                                                                                         |
| SIRT1        | Forward: 5'-AAATGCTGGCCTAATAGAGTGG-3'<br>Reverse: 5'-TGGCAAAAACAGATACTGATTACC-3'                                                                         |
| GAPDH        | Forward: 5'-CCCCGGTTTCTATAAATTGAGC-3'<br>Reverse: 5'-CACCTTCCCCATGGTGTCT-3'                                                                              |
| KISS1 (ChIP) | Forward: 5'-AGAGGGTGTGGAGGATGGAA-3'<br>Reverse: 5'-AGCTCCCTGATCACATCCCT-3'<br>Forward: 5'-ACATATCCGGACCTCCCCAA-3'<br>Reverse: 5'-CTGAGCCTTAGACACACGCA-3' |

**Supplementary Table S2: Western Blot primary antibodies.**

| Antibody                   | Corporation             | Dilution ratio |
|----------------------------|-------------------------|----------------|
| Anti-GAPDH (#2118)         | Cell Signal Technology  | 1:1000         |
| Anti-SIRT1 (sc-15404)      | SantaCruz Biotechnology | 1:1000         |
| Anti-CREB (#9197)          | Cell Signal Technology  | 1:1000         |
| Anti-p-CREB (#9198)        | Cell Signal Technology  | 1:1000         |
| Anti-MMP2 (#4022)          | Cell Signal Technology  | 1:500          |
| Anti-MMP9 (#13667)         | Cell Signal Technology  | 1:500          |
| Anti-E-cadherin (#3195)    | Cell Signal Technology  | 1:1000         |
| Anti-Vimentin (#5741)      | Cell Signal Technology  | 1:1000         |
| Anti-acetyl lysine (#9441) | Cell Signal Technology  | 1:500          |
| Anti-KISS1 (sc-15400)      | SantaCruz Biotechnology | 1:200          |

Supplementary Table S3: Gene expression profiles array after treated with siRNA-SIRT1 in SW620 cells

| Gene name    | Fold change    | Expressed after knockdown of SIRT1 |
|--------------|----------------|------------------------------------|
| <b>KISS1</b> | <b>2.24705</b> | <b>Up</b>                          |
| TRPM1        | 1.857705       | Up                                 |
| IGF1         | 1.827481       | Up                                 |
| CXCR4        | 1.713929       | Up                                 |
| CST7         | 1.707649       | Up                                 |
| SRC          | 1.697056       | Up                                 |
| NR4A3        | 1.594991       | Up                                 |
| NF2          | 1.570819       | Up                                 |
| ETV4         | 1.555651       | Up                                 |
| EWSR1        | 1.536158       | Up                                 |
| TCF20        | 1.480172       | Up                                 |
| FN1          | 1.471329       | Up                                 |
| MYCL         | 1.466075       | Up                                 |
| CCL7         | 1.463801       | Up                                 |
| GAPDH        | 1.458766       | Up                                 |
| IL1B         | 1.427771       | Up                                 |
| SMAD2        | 1.415902       | Up                                 |
| CTSK         | 1.407068       | Up                                 |
| CXCR2        | 1.397773       | Up                                 |
| MDM2         | 1.363847       | Up                                 |
| MGAT5        | 1.358312       | Up                                 |
| CTNNA1       | 1.357375       | Up                                 |
| MMP3         | 1.352322       | Up                                 |
| EPHB2        | 1.348355       | Up                                 |
| TP53         | 1.331378       | Up                                 |
| APC          | 1.320607       | Up                                 |
| CD44         | 1.309848       | Up                                 |
| METAP2       | 1.305436       | Up                                 |
| SMAD4        | 1.301232       | Up                                 |
| MTA1         | 1.29948        | Up                                 |
| SYK          | 1.28477        | Up                                 |
| DENR         | 1.256562       | Up                                 |
| CD82         | 1.247505       | Up                                 |
| MET          | 1.245641       | Up                                 |
| CDKN2A       | 1.241566       | Up                                 |

(Continued)

| Gene name | Fold change | Expressed after knockdown of SIRT1 |
|-----------|-------------|------------------------------------|
| BRMS1     | 1.239961    | Up                                 |
| MMP11     | 1.236387    | Up                                 |
| RORB      | 1.236003    | Up                                 |
| CTSL      | 1.230665    | Up                                 |
| CTBP1     | 1.227442    | Up                                 |
| IL18      | 1.225459    | Up                                 |
| FLT4      | 1.22079     | Up                                 |
| TIMP4     | 1.212688    | Up                                 |
| VEGFA     | 1.210234    | Up                                 |
| SERPINE1  | 1.206345    | Up                                 |
| MMP9      | 1.205592    | Up                                 |
| NME1      | 1.200743    | Up                                 |
| ITGB3     | 1.194326    | Up                                 |
| MCAM      | 1.192628    | Up                                 |
| HRAS      | 1.190056    | Up                                 |
| GNRH1     | 1.189919    | Up                                 |
| TIMP3     | 1.187937    | Up                                 |
| RPSA      | 1.187678    | Up                                 |
| PLAUR     | 1.185667    | Up                                 |
| HPSE      | 1.185449    | Up                                 |
| TGFB1     | 1.180046    | Up                                 |
| CXCL12    | 1.179634    | Up                                 |
| HGF       | 1.179634    | Up                                 |
| MMP13     | 1.171764    | Up                                 |
| HPRT1     | 1.16882     | Up                                 |
| CDH1      | 1.165596    | Up                                 |
| FAT1      | 1.149481    | Up                                 |
| CHD4      | 1.146746    | Up                                 |
| PTEN      | 1.138921    | Up                                 |
| KISS1R    | 1.135941    | Up                                 |
| RPLP0     | 1.134961    | Up                                 |
| HTATIP2   | 1.133161    | Up                                 |
| ITGA7     | 1.130504    | Up                                 |
| SSTR2     | 1.112709    | Up                                 |
| NME4      | 1.111201    | Up                                 |
| MMP2      | 1.106438    | Up                                 |

(Continued)

| Gene name | Fold change | Expressed after knockdown of SIRT1 |
|-----------|-------------|------------------------------------|
| PNN       | 1.102698    | Up                                 |
| FXYD5     | 1.094984    | Up                                 |
| TIMP2     | 1.077983    | Up                                 |
| MYC       | 1.068855    | Up                                 |
| TNFSF10   | 1.067955    | Up                                 |
| KRAS      | 1.056906    | Up                                 |
| COL4A2    | 1.053885    | Up                                 |
| SET       | 1.037131    | Up                                 |
| MTSS1     | 1.018297    | Up                                 |
| MMP7      | 1.01596     | Up                                 |
| RB1       | -1.01693    | Down                               |
| CDH11     | -1.02187    | Down                               |
| B2M       | -1.06535    | Down                               |
| TSHR      | -1.14061    | Down                               |
| FGFR4     | -1.16499    | Down                               |
| MMP10     | -1.29633    | Down                               |
| ACTB      | -1.81644    | Down                               |
| CDH6      | -2.38742    | Down                               |
